# Supplementary material for: Preventing VTE following total hip and knee arthroplasty: Is prediction the future?
Source: PubMed Central journal article supplement — J Thromb Haemost. 2020 Nov 10;19(1):41–5. doi: 10.1111/jth.15132 (PMC7839761; doi:10.1111/jth.15132), 2020-11-10
Supplement: JTH-19-41-s001.pdf [file JTH-19-41-s001.pdf]

## **Supplement files**

### **Preventing VTE following total hip and knee arthroplasty: is prediction the future**

Banne Nemeth, Rob Nelissen, Roopen Arya, Suzanne Cannegieter

## Supplement Table 1:

| Risk prediction model characteristics |                                                                                                                                                                                                                                                                                                                                                                                                                                                                                  |                                              |                            |             |                  | Performance measures |                                                                                                          |                                                           |
|---------------------------------------|----------------------------------------------------------------------------------------------------------------------------------------------------------------------------------------------------------------------------------------------------------------------------------------------------------------------------------------------------------------------------------------------------------------------------------------------------------------------------------|----------------------------------------------|----------------------------|-------------|------------------|----------------------|----------------------------------------------------------------------------------------------------------|-----------------------------------------------------------|
| Publication                           | Population                                                                                                                                                                                                                                                                                                                                                                                                                                                                       | Name risk model                              | Outcome                    | Sample size | Number of events | Discrimination       | Calibration                                                                                              | Validation                                                |
| <b>Dauty et al, 2012</b>              | TKA                                                                                                                                                                                                                                                                                                                                                                                                                                                                              | RAPT                                         | Symptomatic DVT            | 272         | 17               | NR                   | NR                                                                                                       | -                                                         |
| <i>Predictors (n=6)</i>               | Age, gender, average walking distance, use of gait aid, use of community support and care, and social support at discharge                                                                                                                                                                                                                                                                                                                                                       |                                              |                            |             |                  |                      |                                                                                                          |                                                           |
| <b>Parvizi et al, 2014</b>            | THA & TKA (primary and revision)                                                                                                                                                                                                                                                                                                                                                                                                                                                 | -                                            | Symptomatic PE at 90 days  | 26.391      | 281              | NR                   | NR                                                                                                       | Internal by bootstrapping, <i>no performance measures</i> |
| <i>Predictors (n=8)</i>               | Knee surgery, CCI, atrial fibrillation, postoperative DVT, COPD, anaemia, depression, BMI                                                                                                                                                                                                                                                                                                                                                                                        |                                              |                            |             |                  |                      |                                                                                                          |                                                           |
| <b>Parvizi et al, 2016</b>            | THA & TKA                                                                                                                                                                                                                                                                                                                                                                                                                                                                        | -                                            | Symptomatic VTE            | 1.721.806   | 15.775           | NR                   | Good concordance between observed and predicted risk up to 4%, thereafter overestimation of actual risk. | External in single cohort, <i>no performance measures</i> |
| <i>Predictors (n=26)</i>              | Bilateral joints, not primary THA, age, anaemia, CHF, lymphoma, fluid and electrolyte disorders, metastatic cancer, peripheral vascular disease, non-metastatic solid tumours, weight loss, chronic pulmonary heart disease, blood transfusion, history of VTE, myeloproliferative disorders, hypercoagulability state, myocardial infarction, varicose veins, fracture, inflammatory bowel disease, sepsis, periprosthetic joint infection, atrial fibrillation, stroke, apnoea |                                              |                            |             |                  |                      |                                                                                                          |                                                           |
| <b>Bohl et al, 2016</b>               | THA & TKA (primary)                                                                                                                                                                                                                                                                                                                                                                                                                                                              | ACS-NSQIP-derived risk stratification system | Symptomatic PE at 30 days  | 118.473     | 592              | NR                   | NR                                                                                                       | External in single cohort, <i>no performance measures</i> |
| <i>Predictors (n=5)</i>               | Age, sex, BMI, preoperative haematocrit, and procedure type                                                                                                                                                                                                                                                                                                                                                                                                                      |                                              |                            |             |                  |                      |                                                                                                          |                                                           |
| <b>Bateman et al, 2017</b>            | THA & TKA                                                                                                                                                                                                                                                                                                                                                                                                                                                                        | Caprini                                      | Symptomatic VTE at 90 days | 376         | 10               | NR                   | NR                                                                                                       | External in single cohort, <i>no performance measures</i> |
| <i>Predictors (n=20)</i>              | Age, planned operation > 2 h, history of DVT or PE, leg oedema/ulcers/stasis, sepsis, varicose veins, hormone treatment, malignancy, previous immobilisation, CVD, trauma, fracture, obesity, stroke, major surgery, pregnancy, protein C/antithrombin III/protein S deficiency, plasminogen disorders, nephrotic syndrome, paroxysmal nocturnal haemoglobinuria, lupus, polycythaemia vera, inflammatory bowel disease, and other                                               |                                              |                            |             |                  |                      |                                                                                                          |                                                           |

**Table 1:** overview of risk prediction models for VTE following THA or TKA, THA: total hip replacement, TKA: total knee replacement, NR: not reported  
Adapted from Kunutsor, S.K., et al., *Thromb Res*, 2018. 168: p. 148-155.

## Supplement Figure 1

### Incidence VTE

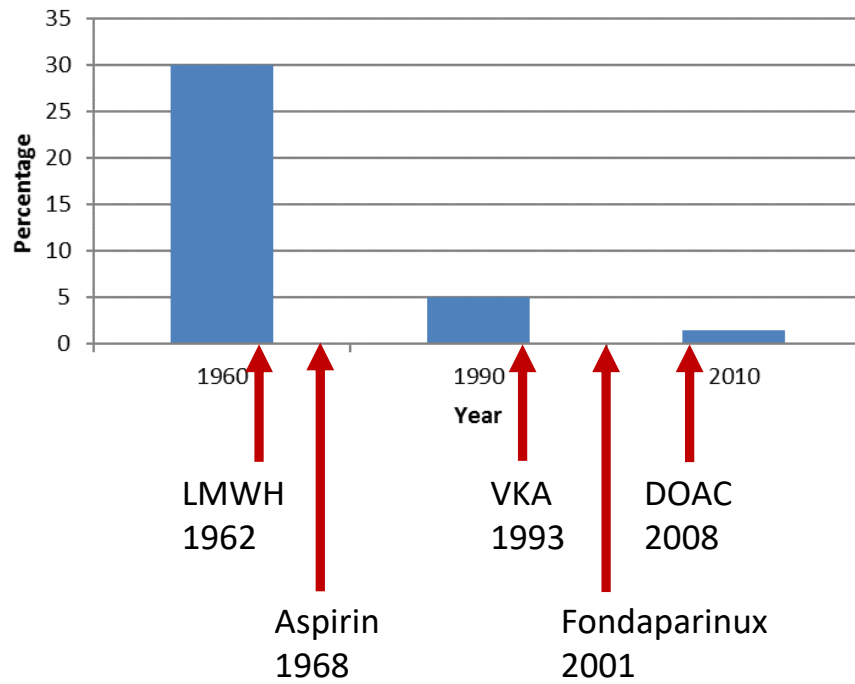

**Figure 1:** Incidence of VTE following total hip and knee arthroplasty including a timeline showing the year of introduction for various classes of anticoagulants.
